# Supplementary material for: Paleomagnetic evidence for Neoarchean plate mobilism
Source: Research Square preprint supplement (doi:10.21203/rs.3.rs-3098027/v1), 2023-07-27
Supplement: Supplementary file 1 [file 54ffcb866cb60df98693780d.xlsx]

## Sheet: tilt-corr Cambrian Layers
		Dike						Cambrian layers									Geographic coordinates				Stratigraphic coordinates
ID	Rock Unit	R.H.Strike (°)	Dip (°)	Latitude (°N)	Longitude (°W)	n	N	R.H.Strike (°)	Dip (°)	components	Dg (°)	Ig (°)	Ds (°)	Is (°)	k	α95 (°)	Plat (°N)	Plon (°E)	dp (°)	dm (°)	Plat (°N)	Plon (°E)	dp (°)	dm (°)
J20S0102	Dike	210		45.4595	110.139	16	16	274.7	17.7	A	162.7	46.3	151.161	62.0674	41.2	5.8	-15.2444	265.71	4.76982	7.43841	2.40709	270.424	6.99516	9.00799
J20S03	Dike	190		45.474	110.139	6	10	274.7	17.7	A	127.7	39.8	112.269	47.4787	19.1	15.7	-6.98963	297.24	11.3326	18.8638	6.19881	304.673	13.2468	20.3949
J20S08	Dike	129	46	45.4522	110.039	8	8	274.7	17.7	A	154.3	52.9	134.371	66.6366	17.1	13.78	-7.71606	271.372	13.1766	19.0564	12.6249	278.575	18.7256	22.7173
J20S11	Dike	90	47	45.3948	109.888	8	8	274.7	17.7	A	178	31.2	175.995	48.7454	200.6	3.92	-27.7319	252.275	2.45388	4.38616	-14.8317	253.71	3.40212	5.16455
J20S14	Dike	334	46	45.3948	109.888	8	8	274.7	17.7	C	135.7	-36.3	143.043	-23.7806	195.7	3.97	45.8254	140.299	2.69284	4.62397	-44.5214	305.548	2.26069	4.23673
J20S16	Dike	92	32	45.3952	109.887	7	8	274.7	17.7	A	171.9	32	168.012	49.1357	137.1	5.17	-26.8241	258.781	3.27468	5.81895	-13.7958	260.785	4.52673	6.84152
J20S19	Dike	83	32	45.3954	109.887	8	8	274.7	17.7	A	171.1	35.2	166.411	52.2433	40.1	8.8	-24.6725	259.352	5.86046	10.156	-10.7933	261.705	8.28325	12.0742
J20S23	Dike			45.3998	109.972	4	5	274.7	17.7	A	148	46.9	130.995	59.5596	34.8	15.8	-10.9321	278.454	13.1634	20.3952	6.34986	285.365	17.8525	23.7516
J20S24	Dike			45.3936	109.883	9	9	274.7	17.7	A	171.3	40.2	165.615	57.2247	141.8	4.34	-21.2425	258.714	3.15619	5.23409	-5.77177	261.492	4.61907	6.33194
J20S2526	Dike	74	51	45.3934	109.883	14	14	274.7	17.7	A	163.8	44.9	153.412	60.8851	349.1	2.1	-16.6231	265.223	1.67649	2.65354	0.477247	269.571	2.45581	3.2116
J20S28	Dike	142	62	45.3783	109.878	11	18	274.7	17.7	A	129.6	41.4	113.363	49.5073	47.6	6.7	-7.04261	295.391	4.98512	8.17316	6.85112	303.05	5.9162	8.90376
J20S31	Dike			45.3651	109.807	8	8	274.7	17.7	C	97.2	-51.9	117.954	-47.8593	35.6	9.41	27.1837	180.077	8.78536	12.8585	-39.2292	343.734	8.00669	12.2754
J20S32	Dike	349	30	45.3558	109.805	5	8	274.7	17.7	B	26.1	0.1	27.0487	-16.3443	110.7	7.3	39.1732	35.6198	3.65001	7.30001	31.0642	38.5089	3.88047	7.52695
J20S33	Dike	319	49	45.3758	109.788	6	8	274.7	17.7	D	89.6	9.5	86.9495	7.50301	11.2	21	3.6827	337.132	10.719	21.2179	-4.8225	159.731	10.636	21.1356
J21S02	Dike	50	78	45.434	110.051	4	8	274.7	17.7	B	165.9	-0.9	165.132	15.8317	105.8	9	43.3272	89.5142	4.50083	9.00083	-34.8553	267.984	4.76604	9.26222
J21S04	Dike			45.436	110.051	4	6	274.7	17.7	B	177.6	3.4	177.108	20.9571	55.1	12.49	-42.8144	253.22	6.26152	12.5065	-33.6625	253.363	6.90777	13.1361
J21S05	Dike	24	78	45.441	110.149	4	8	274.7	17.7	B	191	-29.7	190.294	-12.0934	59.4	12	59.066	48.9377	7.35393	13.2851	49.6692	53.9161	6.20424	12.2025
J21S09	Dike	65	-	45.444	110.03	6	8	274.7	17.7	B	47	-12.2	51.1902	-24.905	18.5	15.99	-23.5243	197.501	8.27206	16.2647	-15.4976	198	9.22149	17.1727
J21S10	Dike	125	77	45.438	110.025	4	8	274.7	17.7	A	151.4	47.3	135.07	60.7451	75.9	10.62	-11.6671	275.427	8.92549	13.7687	5.96169	281.962	12.3742	16.212
J21S11	Dike			45.437	110.027	4	8	274.7	17.7	A	153.3	63.2	116.772	75.3159	53.9	12.6	3.19262	268.626	15.6534	19.8612	28.9693	278.249	21.1273	23.074
Mean						12				A	157.8	44.6			k = 29.1	α95 = 8.2	-14.8	270.9	A95 = 9.0	K = 24.1
													145.3	59.5	k = 29.1	α95 = 8.2					2.1	275.8	A95 = 11.2	K = 16.1

## Sheet: bedding correction
Cambrian measurement #	bedding strike	dip	Dip azimuth	dip	trend of bedding pole	plunge of bedding pole
1	239	23	329	23	149	67	Geraghty, 2013
2	326	24	56	24	236	66	Geraghty, 2013
3	251	12	341	12	161	78	Geraghty, 2013
4	297	11	27	11	207	79	Geraghty, 2013
5	252	29	342	29	162	61	Geraghty, 2013
6	268	15	358	15	178	75	Geraghty, 2013
7	297	28	27	28	207	62	Geraghty, 2013
8	272	24	2	24	182	66	Geraghty, 2013
9	278	20	8	20	188	70	Page and Nokleberg, 1974
10	270	12	0	12	180	78	Page and Nokleberg, 1974
11	270	15	0	15	180	75	Page and Nokleberg, 1974
Mean					184.7	72.3	K = 57.7	α95 = 6.1

## Sheet: AF DEMAG
ID	Rock Unit	Trend	Latitude (°N)	Longitude (°W)	n	N	Dg (°)	Ig (°)	k	α95 (°)
J20S24	Dike	100	45.3936	109.883	4	4	166.3	26.7	87.6	8.5
J20S2526	Dike	100	45.3934	109.883	9	9	160.9	25.1	194.3	3.5

## Sheet: BCT
ID	Rock Unit	Latitude (°N)	Longitude (°W)	n	N	Dg (°)	Ig (°)	k	α95 (°)
J20S08	Dike	45.4522	110.039	8	8	154.3	52.9	17.1	13.78
J20S09	Stillwater	45.4522	110.039	8	9	108.1	-34.7	98.3	5.62
J20S10	Stillwater	45.452	110.039	8	8	106.2	-35.8	264.8	3.41
J20S11	Dike	45.3948	109.888	8	8	178	31.2	200.6	3.92
J20S12	Stillwater	45.3948	109.888	4	6	131.3	8.9	9.4	31.6
J20S13	Stillwater	45.3948	109.888	3	6	132.8	-15.7	74.6	14.4
J20S14	Dike	45.3948	109.888	8	8	135.7	-36.3	195.7	3.97
J20S15	Stillwater	45.3948	109.888	7	8	148.8	-22.6	125.2	5.42
J20S16	Dike	45.3952	109.887	7	8	171.9	32	137.1	5.17
J20S17	Stillwater	45.3952	109.887	4	6	151.1	4.5	29.2	17.3
J20S18	Stillwater	45.3953	109.887	4	6	133	-6.4	57.1	12.3
J20S19	Dike	45.3954	109.887	8	8	171.1	35.2	40.1	8.8
J20S20	Stillwater	45.3954	109.887	4	6	129.6	-19.7	166.6	7.1
J20S21	Stillwater	45.3956	109.887	7	8	134.1	-23.4	147.8	4.98
J20S24	Dike	45.3936	109.883	9	9	171.3	40.2	141.8	4.34
J21S12	Stillwater	45.393	109.883	8	8	139.1	18.1	17.5	13.6
J21S13	Stillwater	45.394	109.884	4	4	155.3	-9.6	32.2	16.4
J20S27F-J	Stillwater	45.3946	109.882	5	5	163.4	-1.7	174.9	5.8
J21S13 and J20S27F-J	Stillwater	45.394	109.883	9	9	159.9	-5.2	50.5	7.3
J20S28	Dike	45.3783	109.878	11	18	129.6	41.4	47.6	6.7
J20S29	Granite	45.3783	109.878	6	8	130.7	45.7	22.7	14.4
J20S30	Granite	45.3805	109.874	6	6	121.7	-52.3	12	20.2

## Sheet: MT component
ID	Rock Unit	Trend	Latitude (°N)	Longitude (°W)	n	N	Dg (°)	Ig (°)	k	α95 (°)	Plat (°N)	Plon (°E)	dp (°)	dm (°)
J20S11	Dike	90	45.3948	109.888	8	8	152.3	-34.7	257	3.46	-55.13	300.315	2.28552	3.9769
J20S12	Stillwater		45.3948	109.888	6	6	134.3	-39.8	92.4	7.01	-46.5948	324.15	5.05995	8.42262
J20S13	Stillwater		45.3948	109.888	6	6	138.3	-39.3	116.7	6.23	-49.0166	319.954	4.45559	7.45095
J20S16	Dike	92	45.3952	109.887	8	8	152.4	-5.9	61.4	7.13	-26.8241	258.781	3.27468	5.81895
J20S17	Stillwater		45.3952	109.887	4	6	142.5	-26.8	67.4	9.74	-45.6012	307.636	5.7461	10.5799
J20S18	Stillwater		45.3953	109.887	6	6	137	-31.1	154.2	5.41	-44.2093	315.746	3.38169	6.04896
J20S19	Dike	83	45.3954	109.887	8	8	143.9	-34.1	128.8	4.9	-49.9705	310.305	3.2057	5.60499
J20S20	Stillwater		45.3954	109.887	6	6	129.2	-38.4	203.7	4.71	-42.4466	327.62	3.31395	5.58726
J20S27	Stillwater		45.3946	109.882	5	5	139.9	-36.5	226.9	5.09	-48.661	316.267	3.46428	5.93855
J21S12	Stillwater		45.393	109.883	8	8	146.9	-18.1	48.4	8.04	-44.0594	298.706	4.33372	8.34782
J21S13	Stillwater		45.394	109.884	4	4	141.3	-30.2	155.9	7.38	-46.4807	310.788	4.55427	8.19885
	Mean				10		140.8	-33.1	89.3	5.1	-47.6	313.4	A95 = 4.4	K = 119.7

## Sheet: tilt-corr Stillwater layers
		Dike						Stillwater layers									Geographic coordinates				Stratigraphic coordinates
ID	Rock Unit	R.H.Strike (°)	Dip (°)	Latitude (°N)	Longitude (°W)	n	N	R.H.Strike (°)	Dip (°)	components	Dg (°)	Ig (°)	Ds (°)	Is (°)	k	α95 (°)	Plat (°N)	Plon (°E)	dp (°)	dm (°)	Plat (°N)	Plon (°E)	dp (°)	dm (°)
J20S0102	Dike	210	-	45.4595	110.139	16	16	317	53	A	162.7	46.3	104.469	42.4052	41.2	5.8	-15.2444	265.71	4.76982	7.43841	7.85429	312.626	4.40115	7.14516
J20S03	Dike	190		45.474	110.139	6	10	307	60	A	127.7	39.8	91.4167	19.1586	19.1	15.7	-6.98963	297.24	11.3326	18.8638	6.02357	331.921	8.53983	16.3753
J20S04	Stillwater			45.4725	110.139		14	307	60
J20S05	Dike	98	35	45.4445	110.035		8	305	45
J20S06	Dike	47	80	45.4484	110.037		9	305	45
J20S07	Stillwater			45.4484	110.037		9	305	45
J20S08	Dike	129	46	45.4522	110.039	8	8	305	45	A	154.3	52.9	90.9684	50.5983	17.1	13.78	-7.71606	271.372	13.1766	19.0564	21.1254	316.255	12.4777	18.5442
J20S09	Stillwater			45.4522	110.039	8	9	305	45		108.1	-34.7	141.536	-34.8576	98.3	5.62	26.0468	161.254	3.71231	6.4596	48.8597	133.197	3.72182	6.46786
J20S10	Stillwater			45.452	110.039	8	8	305	45		106.2	-35.8	141.594	-36.7589	264.8	3.41	25.2054	163.188	2.29361	3.95505	49.8469	134.449	2.33117	3.9873
J20S11	Dike	90	47	45.3948	109.888	8	8	287	76	A	178	31.2	59.2128	65.5138	200.6	3.92	-27.7319	252.275	2.45388	4.38616	50.2087	314.788	5.17367	6.36879
J20S12	Stillwater			45.3948	109.888	4	6	287	76		131.3	8.9	103.71	25.5889	9.4	31.6	-23.9837	305.171	16.0888	31.8875	0.225127	320.987	18.3702	34.0734
J20S13	Stillwater			45.3948	109.888	3	6	287	76		132.8	-15.7	129.777	19.9429	74.6	14.4	34.8591	132.423	7.61839	14.8125	-18.3591	302.933	7.88828	15.0726
J20S14	Dike	334	46	45.3948	109.888	8	8	287	76	C	135.7	-36.3	150.381	13.433	195.7	3.97	45.8254	140.299	2.69284	4.62397	-31.4483	285.228	2.06873	4.05287
J20S15	Stillwater			45.3948	109.888	7	8	287	76		148.8	-22.6	144.166	30.2717	125.2	5.42	47.1488	118.333	3.04755	5.74765	-20.3062	286.928	3.34811	6.02441
J20S16	Dike	92	32	45.3952	109.887	7	8	287	76	A	171.9	32	64.6086	60.8507	137.1	5.17	-26.8241	258.781	3.27468	5.81895	44.3835	320.369	6.04056	7.90312
J20S17	Stillwater			45.3952	109.887	4	6	287	76		151.1	4.5	114.3	43.7998	29.2	17.3	-35.8944	286.705	8.69012	17.3401	2.7084	305.473	13.5007	21.6131
J20S18	Stillwater			45.3953	109.887	4	6	287	76		133	-6.4	120.446	23.3116	57.1	12.3	31.1997	128.727	6.20785	12.3577	-11.4137	309.404	6.96847	13.0929
J20S19	Dike	83	32	45.3954	109.887	8	8	287	76	A	171.1	35.2	60.0958	58.505	40.1	8.8	-24.6725	259.352	5.86046	10.156	46.169	325.99	9.67682	13.0504
J20S20	Stillwater			45.3954	109.887	4	6	287	76		129.6	-19.7	132.502	15.6348	166.6	7.1	34.4764	137.047	3.88074	7.42337	-21.7884	301.955	3.75453	7.30166
J20S21	Stillwater			45.3956	109.887	7	8	287	76		134.1	-23.4	137.772	18.034	147.8	4.98	38.9166	134.548	2.82407	5.30356	-23.5045	296.446	2.68284	5.16925
J20S22	Stillwater	282	39	45.3971	109.97		5	282	42
J20S23	Dike			45.3998	109.972	4	5	282	42	A	148	46.9	87.4363	60.6332	34.8	15.8	-10.9321	278.454	13.1634	20.3952	29.7636	309.374	18.3564	24.0845
J20S24	Dike			45.3936	109.883	9	9	285	80	A	171.3	40.2	45.8393	53.2101	141.8	4.34	-21.2425	258.714	3.15619	5.23409	53.3608	342.23	4.18116	6.02432
J20S2526	Dike	74	51	45.3934	109.883	14	14	285	80	A	163.8	44.9	46.8815	45.9932	349.1	2.1	-16.6231	265.223	1.67649	2.65354	48.8983	349.69	1.71568	2.68437
J20S27A-E	Stillwater			45.3946	109.882	5	5	285	80		130.4	-3.3	113.268	24.3131	74.6	8.91	28.3887	130.033	4.4661	8.92109	-6.529	314.532	5.10389	9.53684
J20S27F-J	Stillwater			45.3946	109.882	5	5	285	80		163.4	-1.7	123.677	56.4358	174.9	5.8	43.1133	93.1542	2.90192	5.80192	6.74779	292.126	6.05112	8.37813
J20S28	Dike	142	62	45.3783	109.878	11	18	275	90	A	129.6	41.4	48.0352	25.2105	47.6	6.7	-7.04261	295.391	4.98512	8.17316	38.3368	2.79279	3.87764	7.20835
J20S29	Granite			45.3783	109.878	6	8	275	90		130.7	45.7	43.3961	24.0513	22.7	14.4	-4.7664	292.737	11.6914	18.3497	40.7803	7.80455	8.22458	15.3905
J20S30	Granite			45.3805	109.874	6	6	275	90		121.7	-52.3	150.376	15.9484	12	20.2	44.1483	165.522	19.0396	27.7344	-30.2493	284.63	10.7062	20.7974
J20S31	Dike			45.3651	109.807	8	8	300	110	C	97.2	-51.9	175.293	2.54803	35.6	9.41	27.1837	180.077	8.78536	12.8585	-43.1739	256.653	4.71198	9.41698
J20S32	Dike	349	30	45.3558	109.805	5	8	300	110	B	26.1	0.1	221.326	-69.7369	110.7	7.3	39.1732	35.6198	3.65001	7.30001	62.3528	307.898	10.7366	12.5201
J20S33	Dike	319	49	45.3758	109.788	6	8	340	68	D	89.6	9.5	103.435	-53.097	11.2	21	3.6827	337.132	10.719	21.2179	32.027	177.482	20.1762	29.1101
J21S01	Dike			45.439	110.051		8	300	55
J21S02	Dike	50	78	45.434	110.051	4	8	300	55	B	165.9	-0.9	151.399	35.3924	105.8	9	43.3272	89.5142	4.50083	9.00083	-20.0035	278.638	6.01267	10.4033
J21S03	Dike	44	86	45.435	110.051	4	8	300	55
J21S04	Dike			45.436	110.051	4	6	300	55	B	177.6	3.4	159.111	46.4216	55.1	12.49	-42.8144	253.22	6.26152	12.5065	-14.415	268.969	10.2985	16.0392
J21S05	Dike	24	78	45.441	110.149	4	8	335	24	B	191	-29.7	198.546	-14.1793	59.4	12	59.066	48.9377	7.35393	13.2851	48.5265	41.3953	6.28274	12.2795
J21S06	Stillwater			45.441	110.149	5	6	335	24		147.6	8.2	144.921	4.49935	65.5	9.5	-32.6618	289.258	4.82359	9.57331	-33.0752	293.111	4.77203	9.522
J21S07	Dike	355	86	45.441	110.147		8	335	24
J21S08	Dike	24	47	45.454	110.129		8	317	53
J21S09	Dike	65	-	45.444	110.03	6	8	305	45	B	47	-12.2	56.1015	-55.6355	18.5	15.99	-23.5243	197.501	8.27206	16.2647	6.01103	207.615	16.3511	22.8672
J21S10	Dike	125	77	45.438	110.025	4	8	300	73	A	151.4	47.3	73.9957	33.5564	75.9	10.62	-11.6671	275.427	8.92549	13.7687	24.0736	337.814	6.88855	12.096
J21S11	Dike			45.437	110.027	4	8	300	73	A	153.3	63.2	55.7521	29.8475	53.9	12.6	3.19262	268.626	15.6534	19.8612	35.1744	353.551	7.7374	13.9636
J21S12	Stillwater			45.393	109.883	8	8	285	80		139.1	18.1	89.8289	35.3626	17.5	13.6	-24.143	295.198	7.33067	14.1207	13.8899	326.24	9.08135	15.7166
J21S13	Stillwater			45.394	109.884	4	4	285	80		155.3	-9.6	130.17	45.9012	32.2	16.4	44.0834	105.542	8.37469	16.5738	-4.36391	293.041	13.3724	20.9431
Mean						12				A	157.8	44.6			k = 29.1	α95 = 8.2	-14.8	270.9	A95 = 9.0	K = 24.1
													69.3	47.3	k = 15.2	α95 = 11.5					35.1	330.7	A95 = 11.9	K = 14.2
