# Supplementary material for: Paleomagnetic evidence for Neoarchean plate mobilism
Source: Research Square preprint supplement (doi:10.21203/rs.3.rs-3098027/v1), 2023-07-27
Supplement: Supplementary file 2 [file 647a081423a99c26b612f5cf.xlsx]

## Sheet: Sheet1
Table S4 Euler rotation parameters for the reconstructions.
West Superior to East Superior	51	275	-14	Evans and Halls (2010)
2710 Ma
Wyoming absolute rotation	18	266	-7	This study
East Superior absolute rotation	-32	71	82	This study
2500 Ma
Wyoming to Superior	48	265	125	Kilian et al. (2016)
East Superior absolute rotation	15	263	-155	This study
2170 Ma
Wyoming to Superior	48	265	125	Kilian et al. (2016)
East Superior absolute rotation	45	273	−89	This study
Evans D, Halls H. Restoring Proterozoic deformation within the Superior craton. Precambrian Research 2010, 183(3): 474-489. Kilian TM, Bleeker W, Chamberlain K, Evans DA, Cousens B. Palaeomagnetism, geochronology and geochemistry of the Palaeoproterozoic Rabbit Creek and Powder River dyke swarms: implications for Wyoming in supercraton Superia. Geological Society, London, Special Publications 201…
