# Supplementary material for: Paleomagnetic evidence for Neoarchean plate mobilism
Source: Research Square preprint supplement (doi:10.21203/rs.3.rs-3098027/v1), 2023-07-27
Supplement: Supplementary file 3 [file 656feda80e6bf4b8ded6e555.xlsx]

## Sheet: Sheet1
Code	Rock unit	Age（Ma）	Age references	Plat （N° )	Plon ( E° )	A95 （° )	1234567 (R)	Paleomagnetic references
Wyoming
W2710	Stillwater complex C2	ca. 2710	Wall et al. (2018)	-83.6	335.8	4	1111100 (5)	Selkin et al. (2008)
W2480	Elbow Creek dikes	ca. 2480	This study	-14.8	270.9	9	1111101 (6)	This study
W2480t	Elbow Creek dikes after tilt correction	ca. 2480	This study	2.1	275.8	11.2	1111101 (6)	This study
W2160	Rabbit Creek, Powder River and South Path Dikes	ca. 2160	Kilian et al. (2016)	65.5	339.2	7.6	1111111 (7)	Kilian et al. (2016)
Superior
GhostR	Ghost Range Intrusion	2712	Ayer et al. (2005)	7	183	8.34386	1110100 (4)	Geissman et al. (1982)
KinoHT	Kinojevis Group	2701	Kerrich et al. (2008)	29	184	9.31665	1101100 (4)	Schutts and Dunlop (1981)
Kamis	Kamiskotia Complex	2704	Hathway et al. (2008)	21	182	3.95727	1111000 (4)	Irving and Naldrett (1977)
Dundo*	Dundonald Sill	2707	Barrie et al. (1999)	23.3	191.4	8.2	1010100 (3)	Irving and Naldrett (1977), recalculated in this study
SE2505	Ptarmigan-Mistassini dikes	ca. 2505	Buchan et al. (1998)	-45.3	213	13.8	1010101 (4)	Evans and Halls (2010, recalculated from earlier studies)
SE2460r	Mean Matachewan dikes R	ca. 2460	Heaman (1997); Halls et al. (2005)	-44.1	238.3	1.6	1111101 (6)	Evans and Halls (2010)
SE2446n	Mean Matachewan dikes N	ca. 2446	Heaman (1997); Halls et al. (2005)	-52.3	239.5	2.4	1111101 (6)	Evans and Halls (2010)
SE2218	Senneterre dikes	ca. 2218	Buchan et al. (1993)	-15.3	284.3	6	1111111 (7)	Buchan et al. (1993)
SE2217	Nipissing N1 dikes	ca. 2217	Andrews et al. (1986); Noble and Lightfoot (1992)	-17	272	10	1111111 (7)	Buchan et al. (2000)
SE2170	Biscotasing dikes	ca. 2170	Halls and Davis (2004)	26	223.9	7	1111101 (6)	Evans and Halls (2010)
* the pole was recalculated using the three sites 31, 32 and 33 from Irving and Naldrett (1977). We did not use sites 34 and 35, because site 34 had only one sample and site 35 had only two samples.
Andrews A, Masliwec A, Morris W, Owsiacki L, York D, 1986. The silver deposits at Cobalt and Gowganda, Ontario. II: An experiment in age determinations employing radiometric and paleomagnetic measurements. Canadian Journal of Earth Sciences, 23(10): 1507-1518. Ayer JA, Thurston PC, Bateman R, Dubé B, Gibson HL, Hamilton MA, Hathway B, Hocker SM, Houlé MG, Hudak G, Ispolatov VO, Lafrance B, Lesher…
