# Supplementary material for: Paleomagnetic evidence for Neoarchean plate mobilism
Source: Research Square preprint supplement (doi:10.21203/rs.3.rs-3098027/v1), 2023-07-27
Supplement: Supplementary file 4 [file 9671cdb76f6b232292caa7e7.xlsx]

## Sheet: U-Pb TIMS data
Table 2. U–Pb ID thermal ionization mass spectrometer baddeleyite results for the Elbow Creek dike, Wyoming craton
Analysis no.	U/Th	Pbc/Pbtot	206Pb/204Pb	207Pb/235U	±2s %error	206Pb/238U	±2s %error	207Pb/235U	206Pb/238U	207Pb/206Pb	±2s	concordance
			raw*	corr**				age. Ma
Bd-1	19.7	0.046	1246.3	10.4447	0.42	0.46689	0.39	2475	2469.9	2479.2	2.8	0.996
Bd-2	14.7	0.029	2075.6	10.3542	0.42	0.46407	0.38	2467	2457.5	2474.8	3.1	0.993
Bd-3	57.3	0.075	801	10.1889	0.82	0.45714	0.8	2452.1	2426.9	2473	4.6	0.981
Bd-4	43.8	0.022	2838.4	10.3264	0.39	0.46285	0.37	2464.5	2452.1	2474.7	2.5	0.991
Pbc: common Pb; Pbtot: total Pb (radiogenic+blank+initial)
*measured ratio, corrected for fractionation and spike.
**isotopic ratios corrected for fractionation (0.1% per amu for Pb), spike contribution, blank (0.3 pg Pb and 0.03 pg U), and initial common Pb. Initial common Pb corrected with isotopic compositions from the model of Stacey and Kramers (1975) at the age of the sample.
Stacey, J.S., and Kramers, J.D., 1975, Approximation of terrestrial lead isotope evolution by a two stage model: Earth and Planetary Science Letters, v. 26(2), p. 207-221.
