# Supplementary material for: Paleomagnetic evidence for Neoarchean plate mobilism
Source: Research Square preprint supplement (doi:10.21203/rs.3.rs-3098027/v1), 2023-07-27
Supplement: Supplementary file 5 [file bf8f635525f7b00e5c00e2c7.xlsx]

## Sheet: Sheet1
	High-P/low-T metamorphic rocks	References	Ophiolites	References	Arc volcanism	References	Tectonic evidence	References	seismic reflection images	References	Numerical models	References	Geochemstry	References	Paleomagnetism	References
0.1
0.2
0.3
0.4
0.5	Jadeitites	Nishimura and Shibata (1989)
0.6	Lawsonite	Kawai et al. (2007)
0.7
0.8	Blueschists	Maruyama et al. (1996)
0.9							Accretionary prisms	Hamilton (1998)
1
1.1
1.2
1.3
1.4
1.5
1.6
1.7			Ophiolites	Dann (1997)
1.8	Eclogites	Weller and St-Onge, (2017)													Relative motion	Zhang et al. (2012)
1.9	Eclogites	Boniface et al. (2012); Melnik et al. (2021)
2	Eclogites	Collins et al. (2004); Möller et al. (1995);	Ophiolites	Scott et al. (1992); Peltonen et al., (1996)											Relative motion	Buchan et al. (2012)
2.1	Eclogites	François et al. (2018);Loose and Schenk (2018)											alkali basaltic magmatism	Liu et al. (2019)	Relative motion	Condie et al. (2022)
2.2													EM and DM signatures	Condie (2015)
2.3
2.4															Relative motion?	Cawood et al. (2018)
2.5	Eclogites	Ning et al. (2022)	Ophiolites?	Kusky et al. (2001)			Synchronous vertical and horizontal tectonism	Lin (2005)	seismic reflection images	Mandal et al. (2018)					Relative motion	This study
2.6					shoshonitic magmatism	Kerrich and Ludden (2000)			dipping seismic reflections	Cook et al. (1999); Van der Velden and Cook (2002)					Relative motion?	Kilian (2015)
2.7					Calc-alkaline andesites	Barnes and van Kranendonk (2014)	Schreiber-Hemlo greenstone?	Polat and Kerrich (1999); Yang et al. (2019)	dipping seismic reflections	Calvert (1995); White et al. (2003)	Geodynamical models	Moyen and van Hunen (2012)			Relative motion?	Strik et al. (2003, 2007)
2.8	Eclogites?	Mints et al. (2010)			Boninitic rocks?	Boily and Dion (2002)	Tokwe terrane, Zimbabwe	Kusky (1998)	dipping seismic reflections	Calvert et al. (2021); de Wit and Tinker (2004)
2.9							Abitibi greenstone belt, Quebec	Mueller et al. (1996)
3													Inclusions in diamond/Ni/Co and Cr/Zn ratios	Shirey and Richardson (2011); Tang et al. (2016)
3.1													Inclusions in diamond/Continental Growth	Smart et al. (2016); Dhuime et al （2012）
3.2							Rifting related rocks?	Van Kranendonk et al. (2007)							Relative motion?	Brenner et al. (2020, 2022)
3.3													melt inclusions in olivine	Sobolev et al. (2019)
3.4					Equivalents of modern boninites?	Parman et al. (2001); Smithies et al. (2004)
3.5									seismic and electrical profiles	Chen et al. (2004)			Titanium isotopic in shales	Greber et al. (2017)
3.6											tonalites	Hastie et al. (2016)	Hafnium isotopes in zircons	Bauer et al. (2020)
3.7
3.8			Ophiolites?	Furnes et al. (2009); Friend and Nutman (2010)			Isua supracrustal sequence?	Shervais (2006); Turner et al. (2014)					basaltic geochemistry	Keller and Schoene (2018)
3.9													Nb/Th and Th/U of mafi c-ultramafi c rocks	Shirey et al. (2008)
4											thermal evolution	Ernst (2017)	Barium content of Archaean continental crust	Huang et al. (2022)
4.1
4.2											thermobarometric analyses of inclusions of zircon	Hopkins et al. (2008)
4.3													protolith for the Jack Hills zircons	Turner et al. (2020)
4.4
4.5
	References
	Barnes SJ, Van Kranendonk MJ. Archean andesites in the east Yilgarn craton, Australia: Products of plume-crust interaction? Lithosphere 2014, 6(2): 80-92. Bauer A, Reimink J, Chacko T, Foley BJ, Shirey S, Pearson D. Hafnium isotopes in zircons document the gradual onset of mobile-lid tectonics. Geochemical Perspectives Letters 2020, 14: 1-6. Boily M, Dion C. Geochemistry of boninite-type volcanic…
